# Supplementary material
Source: Springer Nature journal article supplement (https://www.springermedizin.de/resource/supplementary/12958_2006_305_MOESM3_ESM.pdf/9567586)

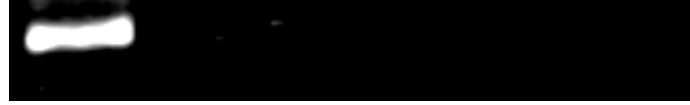

*Spag11t*

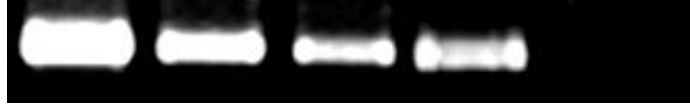

*Spag11c*

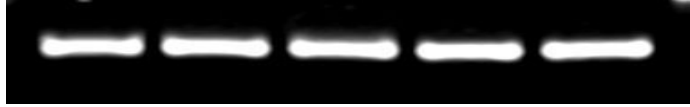

*Gapdh*

**Caput**

**Corpus**

**Cauda**

**Testis**

**Seminal  
vesicle**

Supplement: MOESM3 [file 9567586]
